# Supplementary material
Source: Research Square preprint supplement (doi:10.21203/rs.3.rs-9168846/v1)
Supplement: Supplementary file 2 [file 7931ab0bddb333ac6b9dfb00.docx]

Supplementary Figure S1. Summary of model performance metrics in internal and external validation cohorts.

| Metric | Internal validation (Beibei cohort, n=747) | External validation (Yongchuan cohort, n=156) |
| --- | --- | --- |
| AUC (95% CI) | 0.831 (0.798–0.863) | 0.804 (0.736–0.873) |
| Brier score | 0.142 | 0.194 |
| Hosmer–Lemeshow test (p value) | 0.582 | 0.007 |
| Calibration error – Emax | 0.066 | 0.167 |
| Calibration error – E90 | 0.032 | 0.158 |
| Calibration error – Eavg | 0.013 | 0.093 |
| C-index | 0.831 | 0.804 |
| Decision Curve Analysis | Positive net benefit across clinically relevant thresholds | Positive net benefit; slightly reduced at higher-risk thresholds |

Abbreviations: AUC, area under the receiver operating characteristic curve; Emax, maximum absolute calibration error; E90, calibration error at 90th percentile; Eavg, average calibration error.
