# Supplementary material
Source: Research Square preprint supplement (doi:10.21203/rs.3.rs-9168846/v1)

# Internal Calibration (Training set)

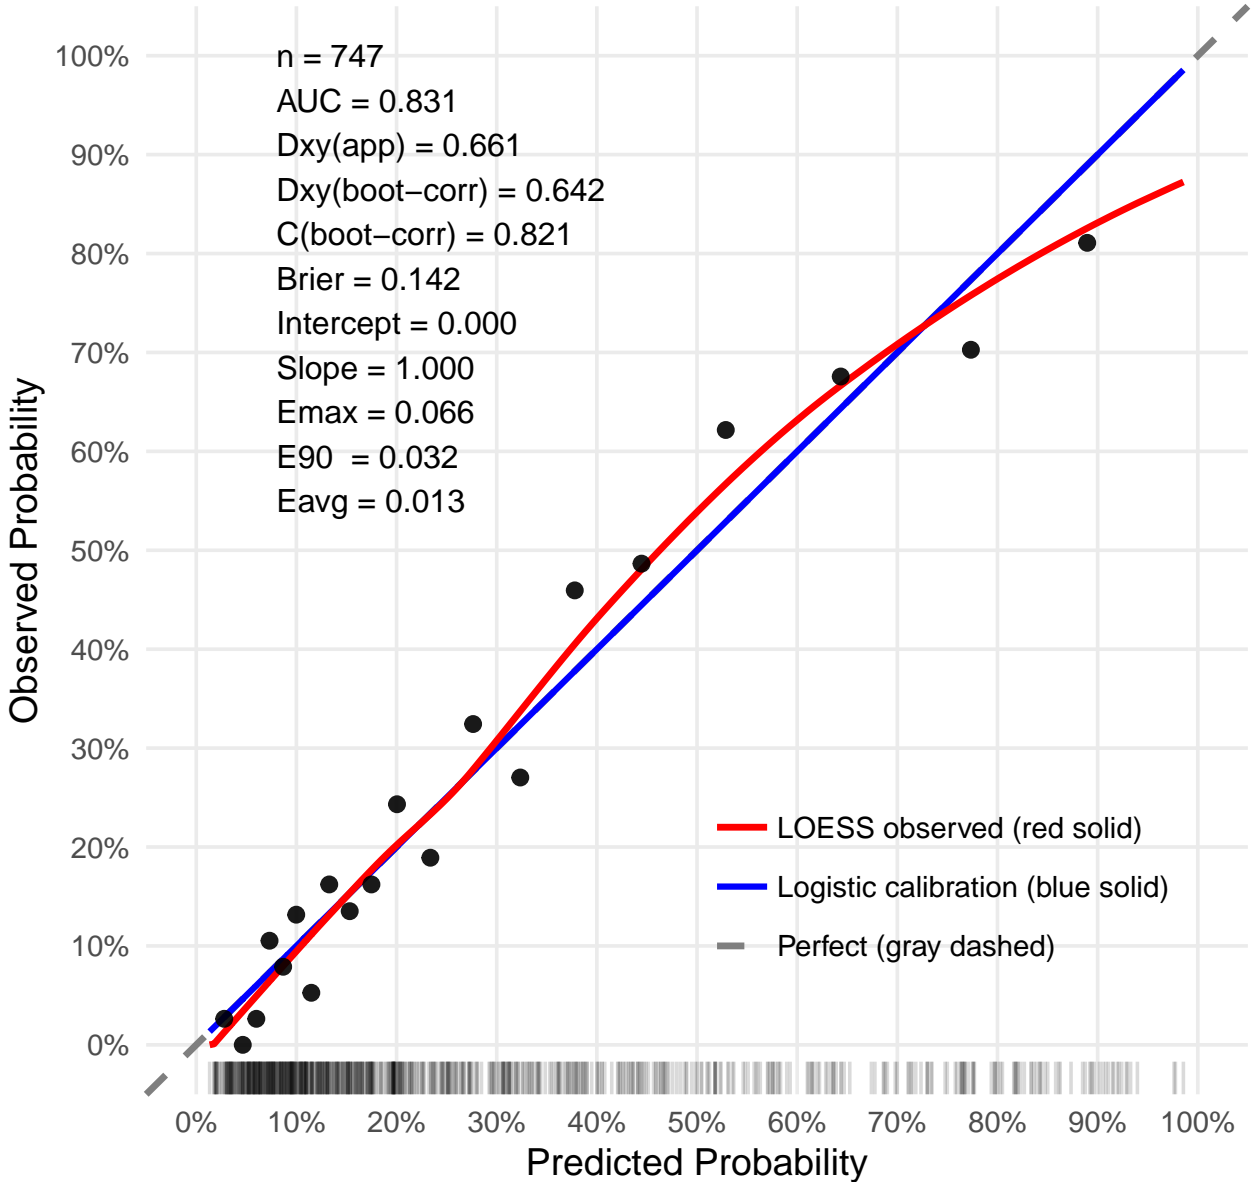

Supplement: Supplementary file 1 [file 215ea12a9e0124d1a2bbe260.pdf]

# External Calibration (Validation set)

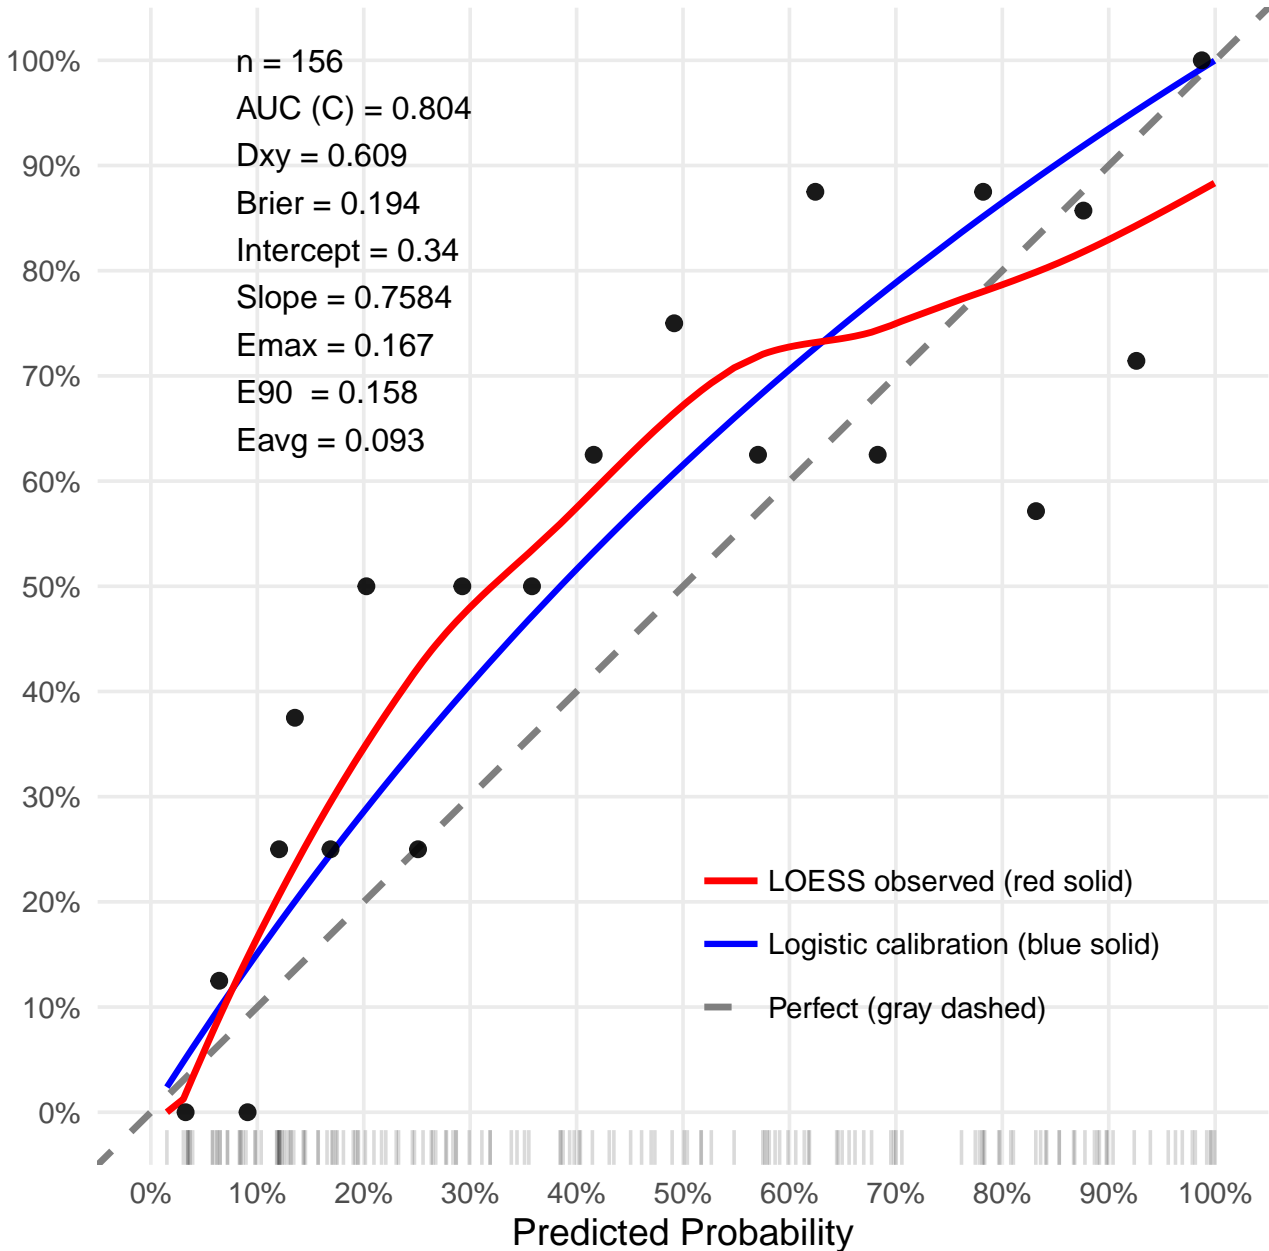

Supplement: Supplementary file 3 [file a1553500651d73f0a7cd0e3d.pdf]
